# Supplementary material for: Multiple paths to rumination within a network analytical framework
Source: Springer Nature journal article supplement (doi:10.1038/s41598-024-61469-6), 2024-05-13
Supplement: 41598_2024_61469_MOESM1_ESM.pdf [file 41598_2024_61469_MOESM1_ESM.pdf]

## Supplementary Materials

**Table S1.** List of Key Variables (Nodes)

| <b>Node</b>                                         | <b>Label</b>      | <b>Description</b>                                                                                                                                                                                                                                                                                                                    | <b>Range and meaning</b>                                                          |
|-----------------------------------------------------|-------------------|---------------------------------------------------------------------------------------------------------------------------------------------------------------------------------------------------------------------------------------------------------------------------------------------------------------------------------------|-----------------------------------------------------------------------------------|
| <i>Rumination, depression and effortful control</i> |                   |                                                                                                                                                                                                                                                                                                                                       |                                                                                   |
| RUM                                                 | Rumination        | Summary score of the Ruminative Response Scale. RRS measures the tendency to ruminate about one's negative feelings, and its potential sources. (Example item: "How often do you .... go someplace alone to think about your feelings").                                                                                              | 22 – 88<br>Higher scores refer to <u>more rumination</u> .                        |
| DEP                                                 | Depression        | Summary score of the Depression subscale of the Depression Anxiety and Stress Scale. Depression subscale measures the level of depression related negative emotional symptoms on a continuum. (Example item: "Indicate how much over the past week did this apply to you .... I felt I wasn't worth much as a person").               | 0 – 42<br>Higher scores refer to <u>greater depressive symptom severity</u> .     |
| EC                                                  | Effortful control | Summary score of the Effortful Control subscale from the Adult Temperament Questionnaire. EC reflects self-regulation abilities in various situations. It includes three subscales: inhibitory control, attention control, and activation control. (Example item: "It is often hard for me to alternate between two different tasks") | 1 – 7<br>Higher scores refer to <u>better self-regulation</u> .                   |
| <i>Goal discrepancy related aspects</i>             |                   |                                                                                                                                                                                                                                                                                                                                       |                                                                                   |
| PRO                                                 | Promotion focus   | Summary score of the Promotion factor from the Regulatory Focus Questionnaire. Promotion focus reflects a tendency to focus on hopes and accomplishments. (Example item: "How often have you accomplished things that got you "psyched" to work even harder?").                                                                       | 1 – 5<br>Higher scores refer to <u>more promotion centered regulatory focus</u> . |

|                              |                                   |                                                                                                                                                                                                                                                                                                                                                                                                                                           |                                                                                                    |
|------------------------------|-----------------------------------|-------------------------------------------------------------------------------------------------------------------------------------------------------------------------------------------------------------------------------------------------------------------------------------------------------------------------------------------------------------------------------------------------------------------------------------------|----------------------------------------------------------------------------------------------------|
| PGF                          | Promotion goal failure            | Summary score of the Computerized Selves questionnaire. Promotion goal failure indicates the level of discrepancy between the ideal self and perceived present self as described by a list of subjectively chosen adjectives. (Example item: <i>“Insert an adjective (e.g., “happy”) that describes you; what kind of person would you ideally like to be. Indicate how far away are you from this goal (i.e. “happy”) at present.”</i> ) | 0 – 7<br>Higher scores refer to <u>more discrepancy between ideal goals and perceived reality.</u> |
| PER                          | Perfectionism                     | Summary score of the Frost Perfectionism Scale. Perfectionism is a personality trait that includes two types of beliefs about oneself: strivings and evaluative concerns. (Example item: <i>“If I fail at work/school, I am a failure as a person.”</i> )                                                                                                                                                                                 | 4 – 20<br>Higher scores refer to <u>greater perfectionism.</u>                                     |
| <i>Metacognitive aspects</i> |                                   |                                                                                                                                                                                                                                                                                                                                                                                                                                           |                                                                                                    |
| CC                           | (Lack of) cognitive confidence    | Summary score of the Cognitive Confidence factor from the Metacognitions Questionnaire. CC captures lack of confidence about one’s memory performance. (Example item: <i>“I do not trust my memory”</i> ).                                                                                                                                                                                                                                | 6 - 24<br>Higher scores refer to <u>lower confidence</u> about one’s memory.                       |
| M-SC                         | Cognitive self-consciousness      | Summary score of the Cognitive Self-Consciousness factor from the Metacognitions Questionnaire. SC captures awareness and monitoring of one’s thinking. (Example item: <i>“I am constantly aware of my thinking”</i> ).                                                                                                                                                                                                                   | 6 – 24<br>Higher scores refer to <u>more self-monitoring.</u>                                      |
| M-NC                         | Need for control of thoughts      | Summary score of the Need to Control Thoughts factor from the Metacognitions Questionnaire. NC captures the tendency to think about one’s thoughts as something that needs to be controlled and regulated at all times. (Example item: <i>“I should be in control of my thoughts all of the time”</i> ).                                                                                                                                  | 6 – 24<br>Higher scores refer to <u>more need for control.</u>                                     |
| PB                           | Positive beliefs about rumination | Summary score of the Positive Beliefs about Rumination Scale. PBRs measures the general tendency to interpret rumination as a positive and useful process that aims to solve the underlying problem. (Example item: <i>“I need to ruminate about my problems to find answers to my depression”</i> ).                                                                                                                                     | 9 – 36<br>Higher scores refer to <u>more positive beliefs</u> about rumination.                    |

|      |                                                          |                                                                                                                                                                                                                                                                                                                                |                                                                                                |
|------|----------------------------------------------------------|--------------------------------------------------------------------------------------------------------------------------------------------------------------------------------------------------------------------------------------------------------------------------------------------------------------------------------|------------------------------------------------------------------------------------------------|
| NB-U | Negative beliefs about uncontrollability and harmfulness | Summary score of the factor Uncontrollability and Harmfulness of Rumination from the Negative Beliefs about Rumination Scale. NBUH measures the general tendency to consider rumination as harmful thinking that cannot be controlled. (Example item: “ <i>How much do you agree that ... ruminating is uncontrollable</i> ”). | 8 – 32<br>Higher scores refer to <u>more feelings of uncontrollability</u> .                   |
| NB-S | Negative beliefs about social consequences               | Summary score of the factor Negative Interpersonal and Social Consequences from the Negative Beliefs about Rumination Scale. NBSC measures the belief that rumination harms social interactions. (Example item: “ <i>How much do you agree that ... ruminating causes me to be rejected by others</i> ”).                      | 5 – 20<br>Higher scores refer to a stronger belief <u>about negative social consequences</u> . |

**Table S2.** Correlation Matrix with Key Variables

|       | PGF | EC          | CC          | PB          | M-SC        | M-NC        | NB-U        | NB-SC       | PRO         | RUM         | DEP         | PER         |
|-------|-----|-------------|-------------|-------------|-------------|-------------|-------------|-------------|-------------|-------------|-------------|-------------|
| PGF   |     | <i>-.31</i> | <i>.18</i>  | <i>.21</i>  | <i>.16</i>  | <i>.17</i>  | <i>.26</i>  | <i>.21</i>  | <i>-.25</i> | <i>.33</i>  | <i>.30</i>  | <i>.13</i>  |
| EC    |     |             | <i>-.47</i> | <i>-.17</i> | <i>-.21</i> | <i>-.24</i> | <i>-.47</i> | <i>-.40</i> | <i>.43</i>  | <i>-.55</i> | <i>-.50</i> | <i>-.26</i> |
| CC    |     |             |             | <i>.21</i>  | <i>.15</i>  | <i>.32</i>  | <i>.38</i>  | <i>.34</i>  | <i>-.32</i> | <i>.46</i>  | <i>.41</i>  | <i>.22</i>  |
| PB    |     |             |             |             | <i>.41</i>  | <i>.36</i>  | <i>.37</i>  | <i>.26</i>  | <i>-.17</i> | <i>.50</i>  | <i>.38</i>  | <i>.22</i>  |
| M-SC  |     |             |             |             |             | <i>.48</i>  | <i>.43</i>  | <i>.25</i>  | <i>-.08</i> | <i>.50</i>  | <i>.32</i>  | <i>.32</i>  |
| M-NC  |     |             |             |             |             |             | <i>.43</i>  | <i>.49</i>  | <i>-.21</i> | <i>.46</i>  | <i>.36</i>  | <i>.35</i>  |
| NB-U  |     |             |             |             |             |             |             | <i>.66</i>  | <i>-.40</i> | <i>.70</i>  | <i>.63</i>  | <i>.31</i>  |
| NB-SC |     |             |             |             |             |             |             |             | <i>-.33</i> | <i>.53</i>  | <i>.53</i>  | <i>.36</i>  |
| PRO   |     |             |             |             |             |             |             |             |             | <i>-.45</i> | <i>-.60</i> | <i>-.02</i> |
| RUM   |     |             |             |             |             |             |             |             |             |             | <i>.70</i>  | <i>.37</i>  |
| DEP   |     |             |             |             |             |             |             |             |             |             |             | <i>.28</i>  |
| PER   |     |             |             |             |             |             |             |             |             |             |             |             |

Notes. PGF – promotion goal failure, EC – effortful control, CC – cognitive confidence, PB – positive beliefs about rumination, M-SC – self-consciousness, M-NC – need for control, NB-U – negative beliefs about uncontrollability, NB – SC – negative beliefs about social consequences, PRO – promotion focus, RUM – rumination, DEP – depression, PER – perfectionism. All correlations in *italic* were statistically significant at  $p < .005$  except PER – PRO ( $p > 0.6$ ), and M-SC – PRO ( $p > 0.08$ ). P-values were calculated with *rcorr()* from *Hmisc* package.

**Table S3.** Edge Weight Matrix for the GGM

|      | PG<br>F | EC   | CC   | PB  | M-S | M-<br>N | NB-<br>U | NB-<br>S | PRO | RUM  | DEP  | PER |
|------|---------|------|------|-----|-----|---------|----------|----------|-----|------|------|-----|
| PGF  | .00     | -.13 | .00  | .00 | .00 | .00     | .00      | .00      | .00 | .00  | .00  | .00 |
| EC   |         | .00  | -.24 | .00 | .00 | .00     | .00      | .00      | .16 | -.21 | .00  | .00 |
| CC   |         |      | .00  | .00 | .00 | .15     | .00      | .00      | .00 | .14  | .00  | .00 |
| PB   |         |      |      | .00 | .16 | .00     | .00      | .00      | .00 | .25  | .00  | .00 |
| M-S  |         |      |      |     | .00 | .30     | .15      | -.15     | .13 | .22  | .00  | .00 |
| M-N  |         |      |      |     |     | .00     | .00      | .28      | .00 | .00  | .00  | .00 |
| NB-U |         |      |      |     |     |         | .00      | .41      | .00 | .27  | .16  | .00 |
| NB-S |         |      |      |     |     |         |          | .00      | .00 | .00  | .12  | .14 |
| PRO  |         |      |      |     |     |         |          |          | .00 | .00  | -.40 | .19 |
| RUM  |         |      |      |     |     |         |          |          |     | .00  | .27  | .10 |
| DEP  |         |      |      |     |     |         |          |          |     |      | .00  | .00 |
| PER  |         |      |      |     |     |         |          |          |     |      |      | .00 |

Notes. PGF – promotion goal failure, EC – effortful control, CC – cognitive confidence, PB – positive beliefs about rumination, M-SC – self-consciousness, M-NC – need for control, NB-U – negative beliefs about uncontrollability, NB – SC – negative beliefs about social consequences, PRO – promotion focus, RUM – rumination, DEP – depression, PER - perfectionism

**GGM Accuracy and Stability Checks:**

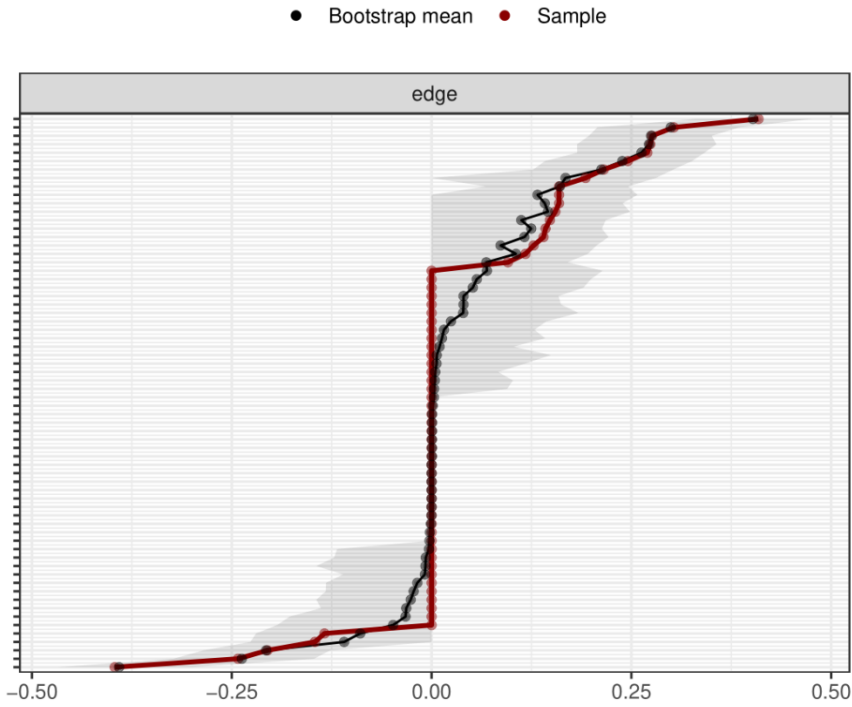

**Figure S1.** Accuracy: Bootstrapped edge weights. How often each edge in 1000 bootstraps was present? Red line indicates sample values, and the black line indicates mean of all bootstraps. The area indicates the bootstrapped confidence intervals. Nodes are not presented on the y-axis to avoid clutter.

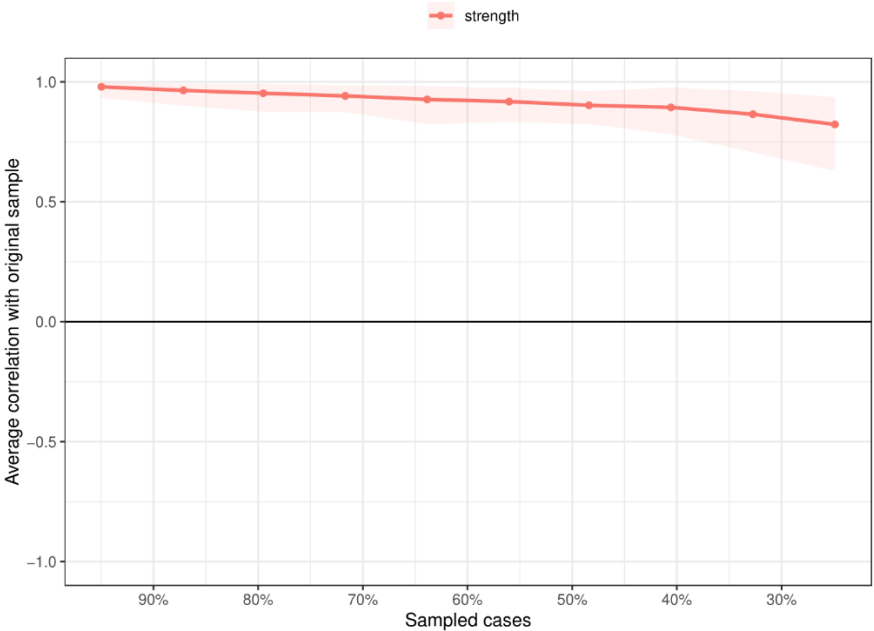

**Figure S2.** Stability: Case-drop bootstrap procedure. How stable is the order of the nodes in terms of strength? Line indicates the mean, and the area indicates the range from 2.5<sup>th</sup> to 97.5<sup>th</sup> quantile.

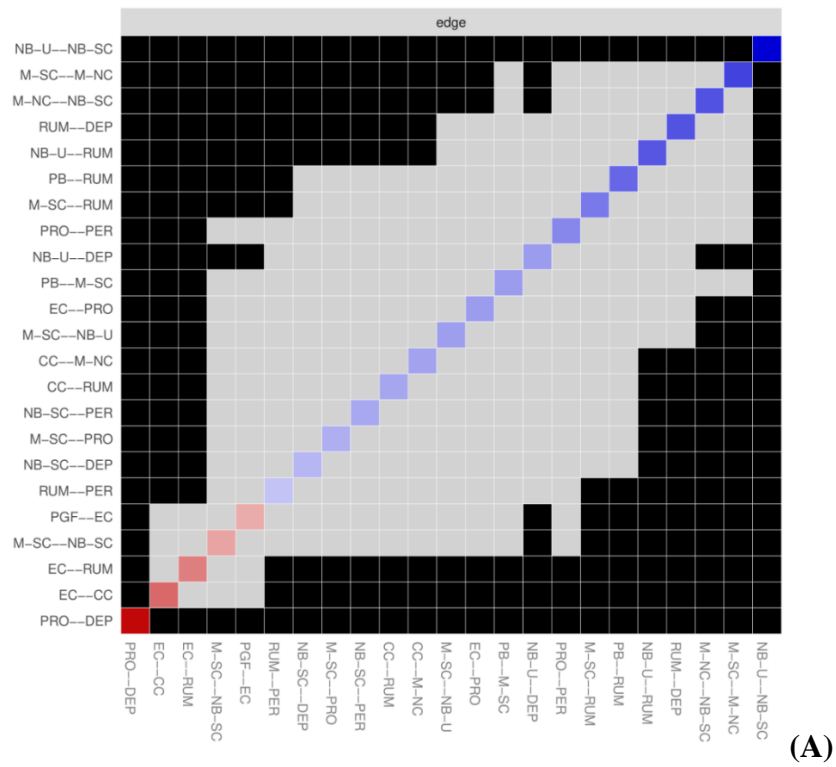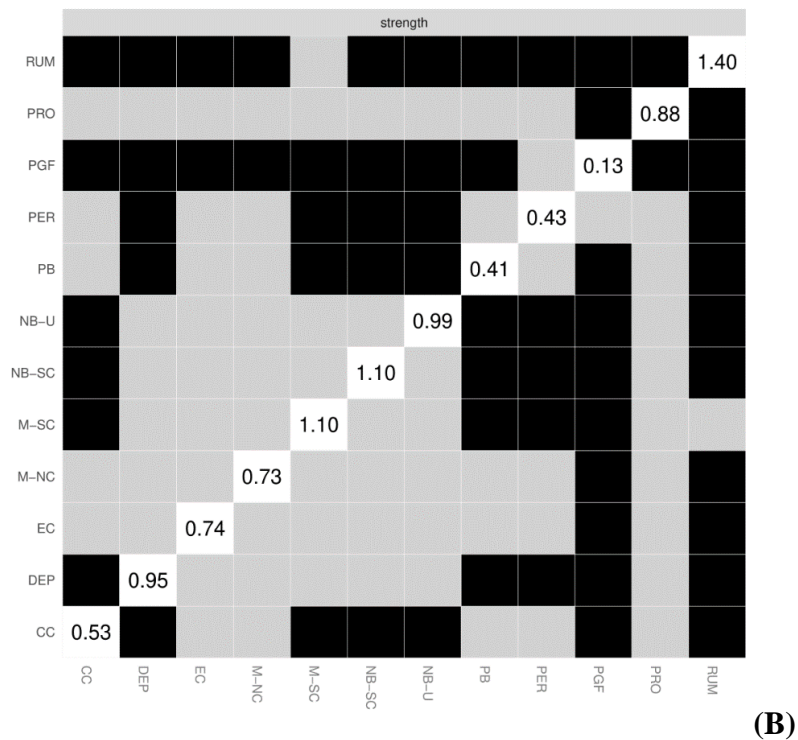

**Figure S3.** Bootstrapped difference tests between all non-zero edges (A) and nodes (B). Black squares indicate significant differences ( $p < 0.05$ ), and gray squares indicate nonsignificant differences between edges (A) or nodes (B).

**Table S4.** Regression Coefficients for the Directed Effects in the Averaged DAG (Figure 2A)

| From (Parent) | To (Child) | Regression Coefficient |
|---------------|------------|------------------------|
| CC            | EC         | <i>-0.38</i>           |
| PRO           | EC         | 0.32                   |
| PB            | M-SC       | 0.42                   |
| M-SC          | M-NC       | 0.47                   |
| M-NC          | NB-SC      | 0.22                   |
| NB-U          | NB-SC      | 0.48                   |
| RUM           | NB-U       | 0.67                   |
| EC            | RUM        | <i>-0.44</i>           |
| PB            | RUM        | 0.32                   |
| M-SC          | RUM        | 0.28                   |
| NB-U          | DEP        | 0.46                   |
| PRO           | DEP        | <i>-0.39</i>           |

Note. This table contains the regression coefficients for nodes in the averaged DAG. Positive values indicate that an increase in the parent node will increase the value of the child node, and negative values indicate that an increase in the parent node will decrease the value of the child node and vice versa. These values are indicative of the valence of potential causal effects. Negative effects are formatted in *italic*.

**Table S5.** PC Stable DAG Bootstrap Results

| <b>From</b> | <b>To</b> | <b>Strength</b> | <b>Direction</b> |
|-------------|-----------|-----------------|------------------|
| PGF         | EC        | .785            | .555             |
| PGF         | CC        | .008            | .500             |
| PGF         | PB        | .169            | .621             |
| PGF         | M-SC      | .006            | .833             |
| PGF         | M-NC      | .010            | .900             |
| PGF         | NB-U      | .009            | .556             |
| PGF         | NB-SC     | .032            | .906             |
| PGF         | PRO       | .223            | .558             |
| PGF         | RUM       | .390            | .904             |
| PGF         | DEP       | .115            | .800             |
| PGF         | PER       | .011            | .500             |
| EC          | PGF       | .785            | .445             |
| EC          | CC        | 1.000           | .472             |
| EC          | PB        | .000            | .000             |
| EC          | M-SC      | .000            | .000             |
| EC          | M-NC      | .000            | .000             |
| EC          | NB-U      | .169            | .322             |
| EC          | NB-SC     | .206            | .570             |
| EC          | PRO       | .938            | .254             |
| EC          | RUM       | .980            | .751             |
| EC          | DEP       | .214            | .685             |
| EC          | PER       | .128            | .582             |
| CC          | PGF       | .008            | .500             |
| CC          | EC        | 1.000           | .529             |
| CC          | PB        | .000            | .000             |
| CC          | M-SC      | .000            | .000             |
| CC          | M-NC      | .592            | .684             |
| CC          | NB-U      | .025            | .460             |
| CC          | NB-SC     | .057            | .702             |
| CC          | PRO       | .130            | .458             |
| CC          | RUM       | .752            | .868             |
| CC          | DEP       | .201            | .662             |
| CC          | PER       | .056            | .696             |
| PB          | PGF       | .169            | .379             |
| PB          | EC        | .000            | .000             |
| PB          | CC        | .000            | .000             |
| PB          | M-SC      | .940            | .602             |
| PB          | M-NC      | .579            | .623             |
| PB          | NB-U      | .013            | .385             |
| PB          | NB-SC     | .000            | .000             |
| PB          | PRO       | .000            | .000             |
| PB          | RUM       | .991            | .798             |
| PB          | DEP       | .126            | .679             |
| PB          | PER       | .015            | .633             |



|       |       |       |       |
|-------|-------|-------|-------|
| M-SC  | PGF   | .006  | .167  |
| M-SC  | EC    | .000  | .000  |
| M-SC  | CC    | .000  | .000  |
| M-SC  | PB    | .940  | .398  |
| M-SC  | M-NC  | 1.000 | .555  |
| M-SC  | NB-U  | .421  | .277  |
| M-SC  | NB-SC | .000  | .000  |
| M-SC  | PRO   | .000  | .000  |
| M-SC  | RUM   | .939  | .909  |
| M-SC  | DEP   | .000  | .000  |
| M-SC  | PER   | .623  | .467  |
| M-NC  | PGF   | .010  | .100  |
| M-NC  | EC    | .000  | .000  |
| M-NC  | CC    | .592  | .316  |
| M-NC  | PB    | .579  | .377  |
| M-NC  | M-SC  | 1.000 | .446  |
| M-NC  | NB-U  | .000  | .000  |
| M-NC  | NB-SC | 1.000 | .517  |
| M-NC  | PRO   | .003  | .667  |
| M-NC  | RUM   | .073  | .596  |
| M-NC  | DEP   | .000  | .000  |
| M-NC  | PER   | .616  | .416  |
| NB-U  | PGF   | .009  | .444  |
| NB-U  | EC    | .169  | .678  |
| NB-U  | CC    | .025  | .540  |
| NB-U  | PB    | .013  | .615  |
| NB-U  | M-SC  | .421  | .723  |
| NB-U  | M-NC  | .000  | .000  |
| NB-U  | NB-SC | 1.000 | .527  |
| NB-U  | PRO   | .012  | .500  |
| NB-U  | RUM   | 1.000 | .456  |
| NB-U  | DEP   | .922  | .593  |
| NB-U  | PER   | .002  | .500  |
| NB-SC | PGF   | .032  | .094  |
| NB-SC | EC    | .206  | .430  |
| NB-SC | CC    | .057  | .298  |
| NB-SC | PB    | .000  | .000  |
| NB-SC | M-SC  | .000  | .000  |
| NB-SC | M-NC  | 1.000 | .484  |
| NB-SC | NB-U  | 1.000 | .474  |
| NB-SC | PRO   | .001  | 1.000 |
| NB-SC | RUM   | .003  | 1.000 |
| NB-SC | DEP   | .781  | .522  |
| NB-SC | PER   | .793  | .458  |
| PRO   | PGF   | .223  | .442  |
| PRO   | EC    | .938  | .746  |
| PRO   | CC    | .130  | .542  |
| PRO   | PB    | .000  | .000  |

|     |       |       |       |
|-----|-------|-------|-------|
| PRO | M-SC  | .000  | .000  |
| PRO | M-NC  | .003  | .333  |
| PRO | NB-U  | .012  | .500  |
| PRO | NB-SC | .001  | .000  |
| PRO | RUM   | .003  | .500  |
| PRO | DEP   | 1.000 | .518  |
| PRO | PER   | .009  | .000  |
| RUM | PGF   | .390  | .096  |
| RUM | EC    | .980  | .249  |
| RUM | CC    | .752  | .132  |
| RUM | PB    | .991  | .202  |
| RUM | M-SC  | .939  | .091  |
| RUM | M-NC  | .073  | .404  |
| RUM | NB-U  | 1.000 | .545  |
| RUM | NB-SC | .003  | .000  |
| RUM | PRO   | .003  | .500  |
| RUM | DEP   | 1.000 | .451  |
| RUM | PER   | .450  | .376  |
| DEP | PGF   | .115  | .200  |
| DEP | EC    | .214  | .315  |
| DEP | CC    | .201  | .338  |
| DEP | PB    | .126  | .321  |
| DEP | M-SC  | .000  | .000  |
| DEP | M-NC  | .000  | .000  |
| DEP | NB-U  | .922  | .407  |
| DEP | NB-SC | .781  | .478  |
| DEP | PRO   | 1.000 | .483  |
| DEP | RUM   | 1.000 | .549  |
| DEP | PER   | .005  | .600  |
| PER | PGF   | .011  | .500  |
| PER | EC    | .128  | .418  |
| PER | CC    | .056  | .304  |
| PER | PB    | .015  | .367  |
| PER | M-SC  | .623  | .533  |
| PER | M-NC  | .616  | .584  |
| PER | NB-U  | .002  | .500  |
| PER | NB-SC | .793  | .542  |
| PER | PRO   | .009  | 1.000 |
| PER | RUM   | .450  | .624  |
| PER | DEP   | .005  | .400  |

**Averaged DAG (MMHC):**

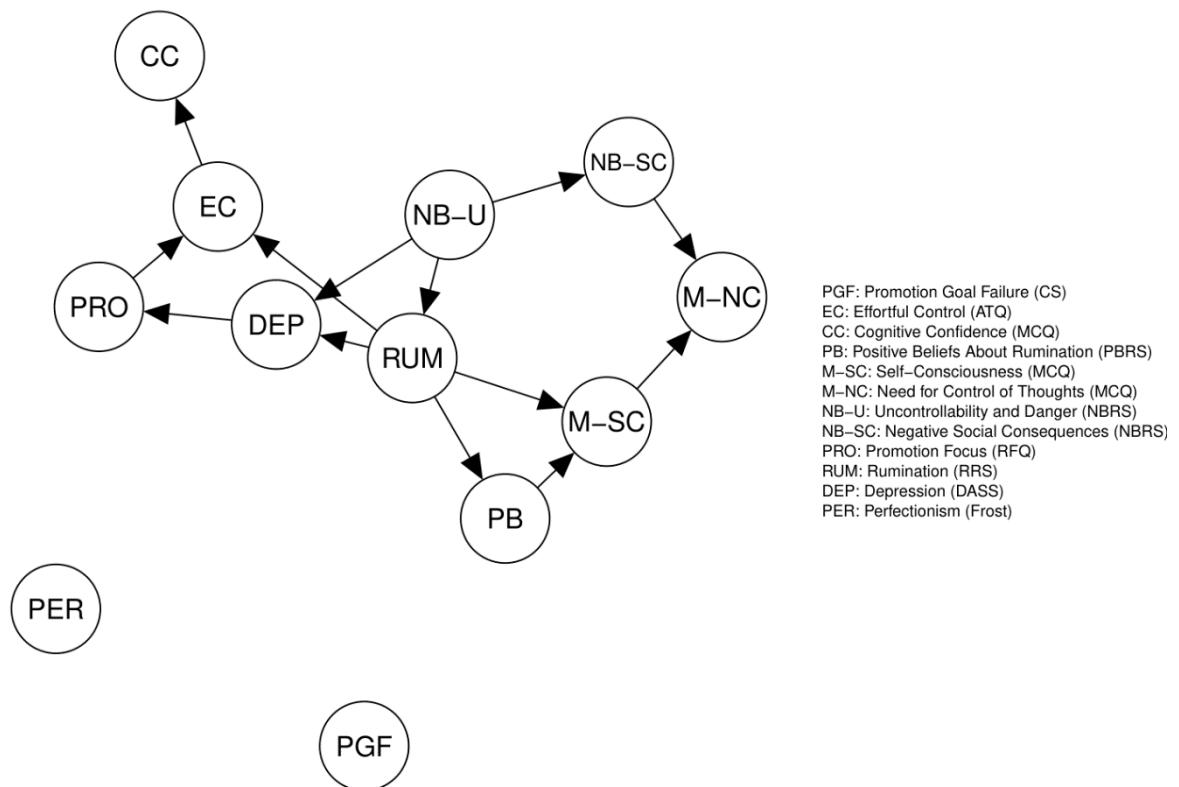

**Figure S4.** Averaged DAG from 1000 bootstrapped models obtained with the MMHC algorithm

**Table S6.** Sample age, sex, and ethnicity distributions

| Age (years) | Women |       |       |       |     | Men   |       |       |       |     |
|-------------|-------|-------|-------|-------|-----|-------|-------|-------|-------|-----|
|             | 18-27 | 28-37 | 38-47 | 48-57 | 58+ | 18-27 | 28-37 | 38-47 | 48-57 | 58+ |
| Asian       | 4     | 4     | 3     | 2     | 3   | 6     | 5     | 4     | 1     | 3   |
| Black       | 3     | 2     | 2     | 1     | 1   | 2     | 3     | 2     | 1     | 0   |
| Mixed       | 1     | 1     | 2     | 0     | 1   | 1     | 2     | 1     | 1     | 1   |
| Other       | 0     | 1     | 0     | 0     | 0   | 1     | 0     | 1     | 0     | 0   |
| White       | 35    | 33    | 38    | 38    | 80  | 33    | 29    | 39    | 35    | 66  |

Note. 6 subjects selected “other” or “prefer not to respond”. This distribution corresponds to the UK census data.
